# Supplementary material
Source: Royal Society of Chemistry journal article supplement (doi:10.1039/d6cp01186a)

## Ion Vibrational Spectroscopy of the Microhydrated Iodate Anion: Unveiling the Onset of Heterogeneous Ion Solvation

Arghya Chakraborty,<sup>a</sup> Huiyan Li,<sup>b,d</sup> Zhi-Feng Liu,<sup>b,c†</sup> Knut R. Asmis<sup>a†</sup>

<sup>a</sup> *Wilhelm-Ostwald-Institut für Physikalische und Theoretische Chemie, Universität Leipzig, Linnéstrasse 2, D-04103 Leipzig, Germany*

<sup>b</sup> *Department of Chemistry and Centre for Scientific Modelling and Computation, Chinese University of Hong Kong, Hong Kong, China*

<sup>c</sup> *Ganjiang Innovation Academy, Chinese Academy of Sciences, Ganzhou, Jiangxi, 341000, China*

<sup>d</sup> *College of Life Science and Chemistry, Jiangsu Second Normal University, Nanjing, China*

<sup>†</sup> *Corresponding authors: [zfliu@cuhk.edu.hk](mailto:zfliu@cuhk.edu.hk), [knut.asmis@uni-leipzig.de](mailto:knut.asmis@uni-leipzig.de)*

### Table of Content:

**Figure S1a.** Structures and relative energies of  $\text{IO}_3^-(\text{H}_2\text{O})_n$  ( $n = 1-5$ ) isomers.

**Figure S1b.** Structures and relative energies of  $\text{IO}_3^-(\text{H}_2\text{O})_n$  ( $n = 6-8,11$ ) isomers.

**Figure S1c.** Structures and relative energies of  $\text{IO}_3^-(\text{H}_2\text{O})_n$  ( $n = 10$ ) isomers.

**Table S1a.** Relative electronic energies for the isomer of  $\text{IO}_3^-(\text{H}_2\text{O})_n$  ( $n = 1-8$ ).

**Table S1b.** Relative electronic energies for the isomer of  $\text{IO}_3^-(\text{H}_2\text{O})_n$  ( $n = 10-12$ ).

**Table S2:** Relative MP2 electronic energies after entropic energy correction for the lowest at cluster size  $n = 2$  and 11.

**Figure S2a.** Comparison of IRPD of  $\text{IO}_3^-(\text{H}_2\text{O})$  with MP2/def2TZVP derived harmonic and anharmonic and D<sub>2</sub>-tagged (harmonic) spectra.

**Figure S2b.** Comparison of IRPD of  $\text{IO}_3^-(\text{H}_2\text{O})$  with MP2/def2TZVP derived harmonic and MD simulated spectrum.

**Figure S3.** Comparison of IRPD of  $\text{IO}_3^-(\text{H}_2\text{O})_2$  with MP2/def2TZVP derived harmonic and MD simulated spectrum.

**Figure S4.** Comparison of IRPD of  $\text{IO}_3^-(\text{H}_2\text{O})_3$  with MP2/def2TZVP derived harmonic and anharmonic IR spectra as well as MD simulated spectrum.

**Figure S5.** Structure of **3.3.3** of  $[\text{IO}_3^-(\text{H}_2\text{O})_3]$  and a snapshot from MD simulation

**Figure S6.** Comparison of IRPD spectrum of  $\text{D}_2$ -tagged  $\text{IO}_3^-(\text{H}_2\text{O})_6$  with theory

**Figure S7.** Comparison of IRPD spectrum of  $\text{D}_2$ -tagged  $\text{IO}_3^-(\text{H}_2\text{O})_7$  with theory

**Figure S8.** Comparison of IRPD spectrum of  $\text{D}_2$ -tagged  $\text{IO}_3^-(\text{H}_2\text{O})_8$  with theory

**Figure S9.** Quadrupole mass spectra of  $\text{KIO}_3$  in 1:1 water/acetonitrile mixture

**Figure S10.** Comparison of IRPD with IRMPD spectrum for a iodate-water complex

**Figure S1a.** Structures and their zero-point energy corrected relative electronic energies ( $\Delta E_0$  in kJ/mol) of each  $\text{IO}_3^-(\text{H}_2\text{O})_n$  ( $n = 1-5$ ) clusters obtained with MP2/def2TZVP and B3LYP/def2TZVP methods. Relative energies obtained at DFT level are in *italic* in the parenthesis.

**$n = 1$**

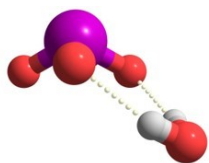

**1.2.0**  
(0.0, 0.0)

**$n = 2$**

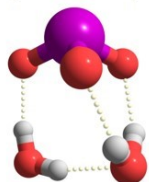

**2.3.1**  
(0.0, 0.0)

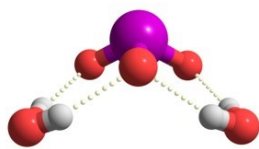

**2.4.0**  
(0.5, 1.0)

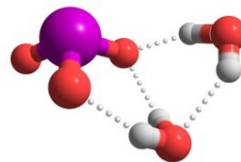

**2.3.1**  
(4.5, 3.6)

**$n = 3$**

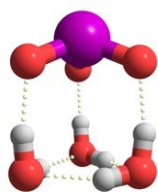

**3.3.3**  
(0.0, 0.0)

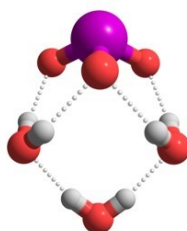

**3.4.2**  
(9.5, 10.5)

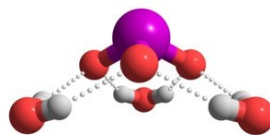

**3.6.0**  
(10.4, 14.8)

**$n = 4$**

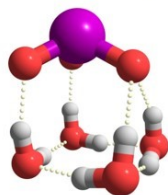

**4.4.4**  
(0.0, 0.0)

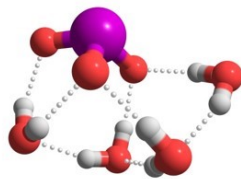

**4.5.3a**  
(6.0, 9.2)

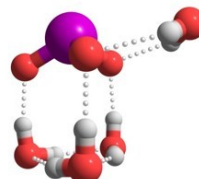

**4.5.3b**  
(9.5, 11.4)

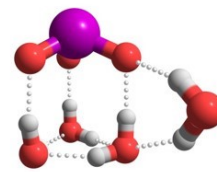

**4.4.4a**  
(11.1, 11.1)

**$n = 5$**

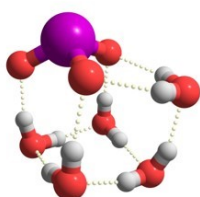

**5.5.5a**  
(0.0, 0.0)

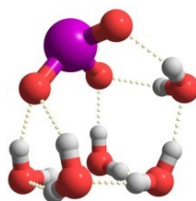

**5.5.5b**  
(6.0, 5.6)

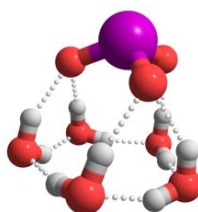

**5.5.5c**  
(6.2, --)

**Figure S1b.** Structures and their zero-point energy corrected relative electronic energies ( $\Delta E_0$  in kJ/mol) of each  $\text{IO}_3^-(\text{H}_2\text{O})_n$  ( $n = 6-8,11$ ) clusters obtained with MP2/def2TZVP and B3LYP/def2TZVP methods. Relative energies obtained at DFT level are in *italic* in the

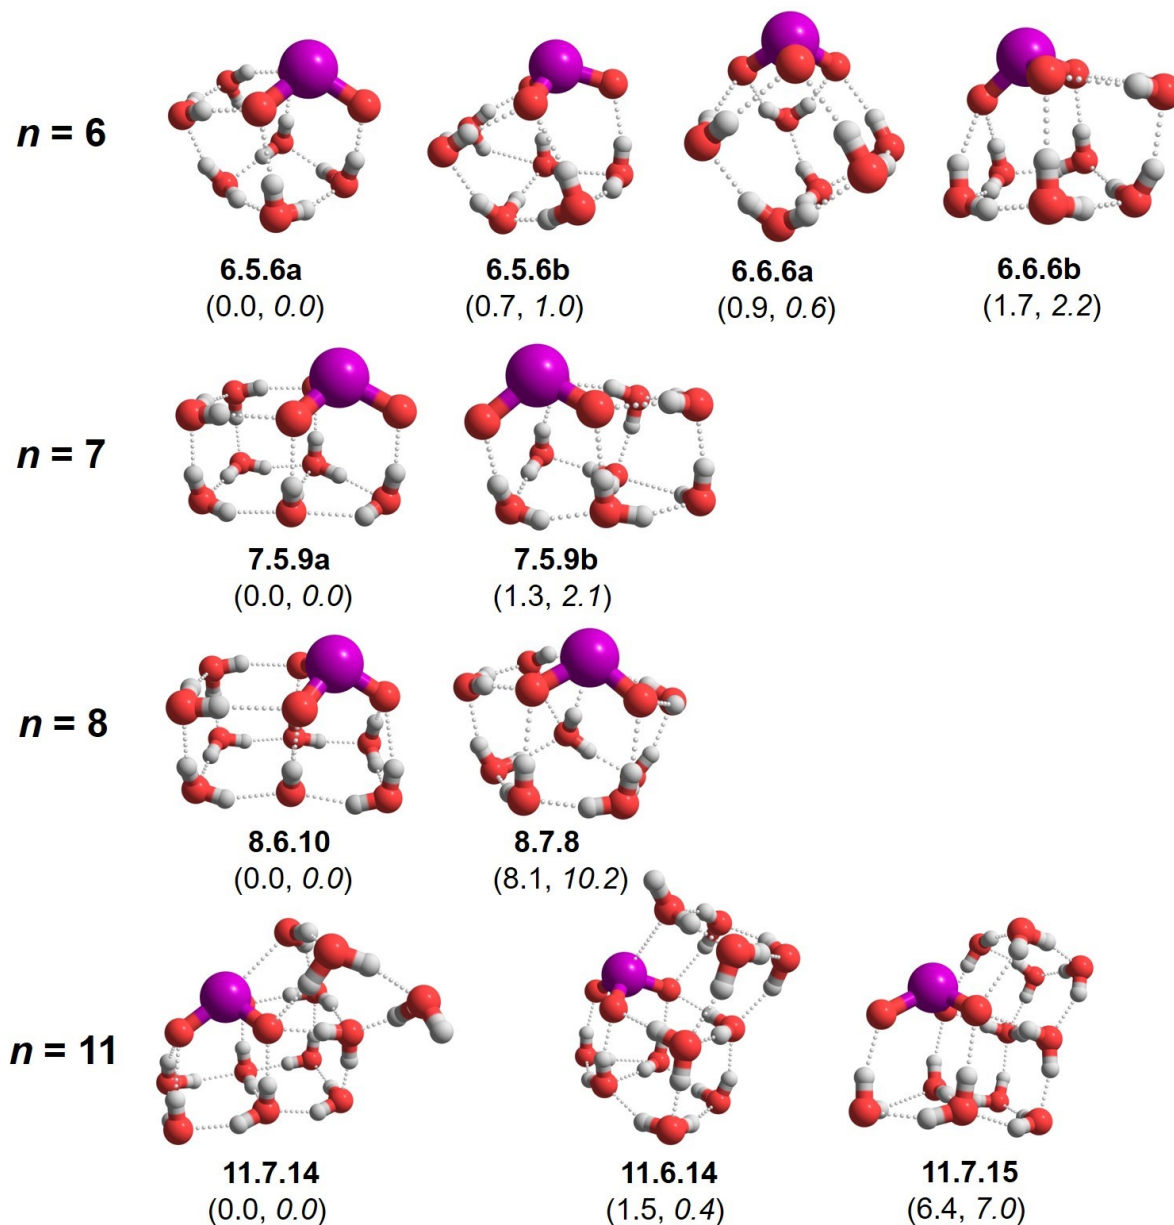

parenthesis.

**Figure S1c.** Structures and their zero-point energy corrected relative electronic energies ( $\Delta E_0$  in kJ/mol) of  $\text{IO}_3^-(\text{H}_2\text{O})_{10}$  clusters obtained with MP2/def2TZVP and B3LYP/def2TZVP methods. Relative energies obtained at DFT level are in *italic* in the parenthesis.

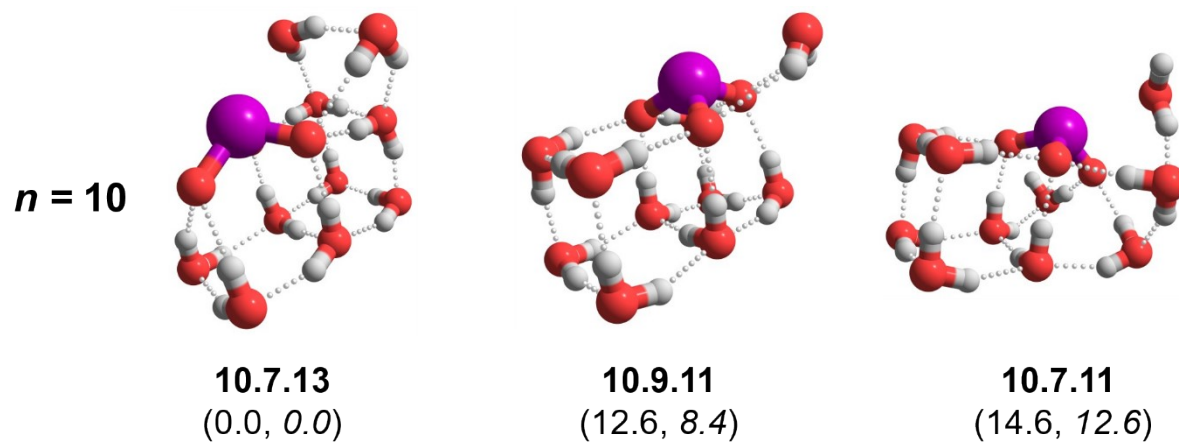

**Table S1a.** Relative electronic energies without ( $\Delta E$  in kJ/mol) and with zero-point energy ( $\Delta E_0$  in kJ/mol) correction of lowest minimum of each  $\text{IO}_3^-(\text{H}_2\text{O})_n$  ( $n = 1-8$ ) clusters calculated at DFT and MP2.

| Species | Isomers       | DFT        |              | MP2        |              |
|---------|---------------|------------|--------------|------------|--------------|
|         |               | $\Delta E$ | $\Delta E_0$ | $\Delta E$ | $\Delta E_0$ |
| $n = 1$ | <b>1.2.0</b>  | 0.0        | 0.0          | 0.0        | 0.0          |
| 2       | <b>2.3.1</b>  | 0.0        | 0.0          | 0.0        | 0.0          |
|         | <b>2.4.0</b>  | 3.7        | 1.0          | 3.2        | 0.5          |
|         | <b>2.3.1</b>  | 4.7        | 3.6          | 5.4        | 4.5          |
| 3       | <b>3.3.3</b>  | 0.0        | 0.0          | 0.0        | 0.0          |
|         | <b>3.4.2</b>  | 14.8       | 10.5         | 12.9       | 9.0          |
|         | <b>3.6.0</b>  | 23.9       | 14.8         | 19.2       | 10.4         |
| 4       | <b>4.4.4</b>  | 0.0        | 0.0          | 0.0        | 0.0          |
|         | <b>4.5.3a</b> | 12.5       | 9.2          | 9.4        | 6.0          |
|         | <b>4.5.3b</b> | 15.0       | 11.4         | 13.5       | 9.5          |
|         | <b>4.4.4a</b> | 16.8       | 11.0         | 18.5       | 13.8         |
| 5       | <b>5.5.5a</b> | 0.0        | 0.0          | 0.0        | 0.0          |
|         | <b>5.5.5b</b> | 7.3        | 5.6          | 7.2        | 6.0          |
|         | <b>5.5.5c</b> | 7.7        | 6.2          | 7.6        | 6.5          |
| 6       | <b>6.5.6a</b> | 0.0        | 0.0          | 0.0        | 0.0          |
|         | <b>6.5.6b</b> | 1.8        | 0.6          | 2.4        | 0.9          |
|         | <b>6.6.6a</b> | 1.6        | 1.0          | 1.1        | 0.7          |
|         | <b>6.6.6b</b> | 3.1        | 2.2          | 2.9        | 1.7          |
| 7       | <b>7.5.9a</b> | 0.0        | 0.0          | 0.0        | 0.0          |
|         | <b>7.5.9b</b> | 3.7        | 2.1          | 2.2        | 1.3          |
|         | <b>7.5.7</b>  | 8.8        | 5.3          |            |              |
| 8       | <b>8.6.10</b> | 0.0        | 0.0          | 0.0        | 0.0          |
|         | <b>8.7.8</b>  | 13.9       | 10.2         | 11.6       | 8.1          |

**Table S1b.** Relative electronic energies without ( $\Delta E$  in kJ/mol) and with zero-point energy ( $\Delta E_0$  in kJ/mol) correction of lowest minimum of each  $\text{IO}_3^-(\text{H}_2\text{O})_n$  ( $n = 10-12$ ) clusters calculated with DFT.

| Species  | Isomers        | DFT        |              | MP2        |              |
|----------|----------------|------------|--------------|------------|--------------|
|          |                | $\Delta E$ | $\Delta E_0$ | $\Delta E$ | $\Delta E_0$ |
| $n = 10$ | <b>10.7.13</b> | 0.0        | 0.0          | 0.0        | 0.0          |
|          | <b>10.9.11</b> | 12.8       | 8.4          | 16.4       | 12.3         |
|          | <b>10.7.11</b> | 17.5       | 12.6         | 19.5       | 14.6         |
| 11       | <b>11.7.14</b> | 0.0        | 0.0          | 0.0        | 0.0          |
|          | <b>11.6.14</b> | 0.6        | 0.4          | 2.2        | 1.5          |
|          | <b>11.7.15</b> | 5.5        | 4.8          | 6.5        | 6.4          |
|          | <b>11.7.13</b> | 15.6       | 12.3         | 14.5       | 11.8         |
|          | <b>11.7.14</b> | 26.9       | 21.9         | 27.9       | 23.3         |
|          | <b>11.9.12</b> | 29.9       | 23.5         | 28.6       | 22.3         |
|          | <b>12.7.16</b> | 0.0        | 0.0          | 0.0        | 0.0          |
| 12       | <b>12.8.16</b> | 11.1       | 10.8         | 11.5       | 10.3         |
|          | <b>12.7.15</b> | 22.4       | 16.3         | 23.9       | 18.0         |
|          | <b>12.7.15</b> | 29.3       | 24.2         | 21.7       | 16.5         |
|          | <b>12.8.15</b> | 34.8       | 28.1         | 33.3       | 27.3         |
|          | <b>12.9.14</b> | 43.9       | 36.7         | 36.0       | 27.4         |

**Table S2.** Relative MP2 electronic energies after entropic energy ( $\Delta E_0$  in kJ/mol) correction for the lowest lying structures of  $[\text{IO}_3^-(\text{H}_2\text{O})_n]$  at cluster size  $n = 2$  and 11.

| Cluster Size | Isomers | $\Delta E$ |              |              |
|--------------|---------|------------|--------------|--------------|
|              |         | <b>0 K</b> | <b>100 K</b> | <b>200 K</b> |
| $n = 2$      | 2.3.1   | 0.0        | 0.5          | 1.8          |
|              | 2.4.0   | 0.5        | 0.0          | 0.0          |
| $n = 11$     | 11.7.14 | 0.0        | 0.0          | 0.0          |
|              | 11.6.14 | 1.5        | 2.7          | 3.2          |

**Figure S2a.** Comparison of IRPD spectrum (trace a) of D<sub>2</sub>-tagged IO<sub>3</sub><sup>-</sup>(H<sub>2</sub>O) with scaled MP2/def2TZVP and unscaled VPT2/MP2/def2TZVP derived harmonic (trace b) and anharmonic (trace c) IR spectra of the lowest energy isomer **1.2.0**, respectively. The effect of messenger (D<sub>2</sub>) tagging has been computed in trace d.

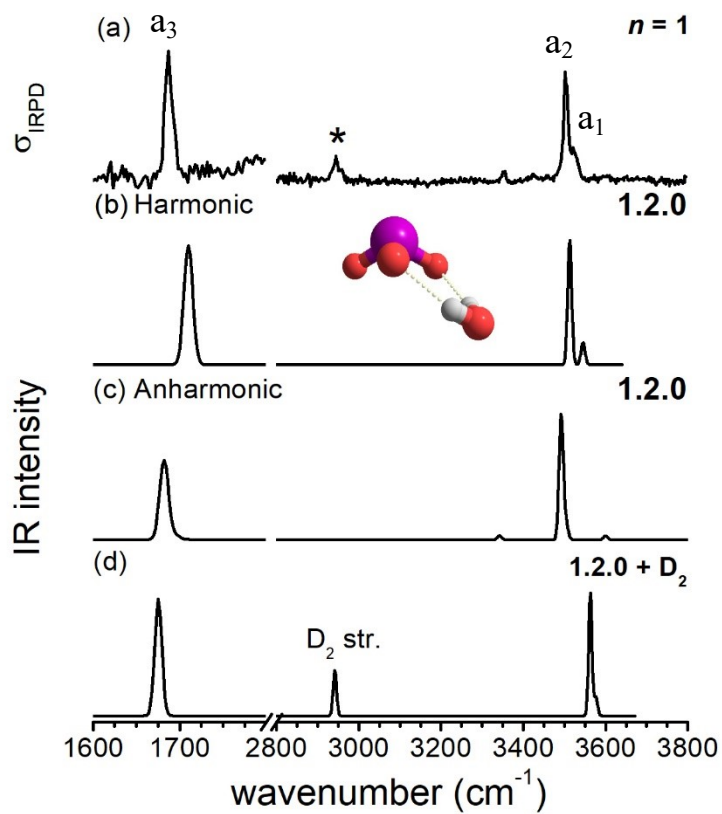

**Figure S2b.** Comparison of IRPD spectrum (trace a) of D<sub>2</sub>-tagged IO<sub>3</sub><sup>-</sup>(H<sub>2</sub>O) with scaled MP2/def2TZVP (trace b) and unscaled AIMD simulated IR spectra of the lowest energy isomer **1.2.0** at temperature 20 K (trace c) and 100 K (trace d).

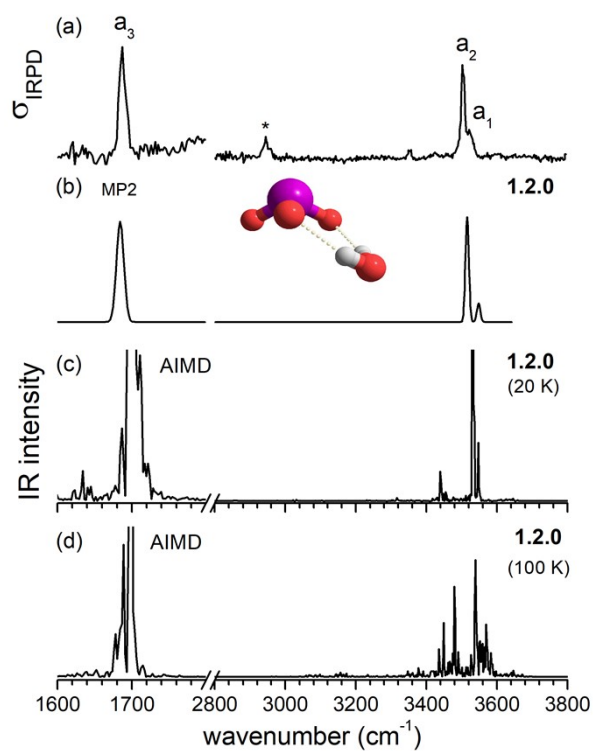

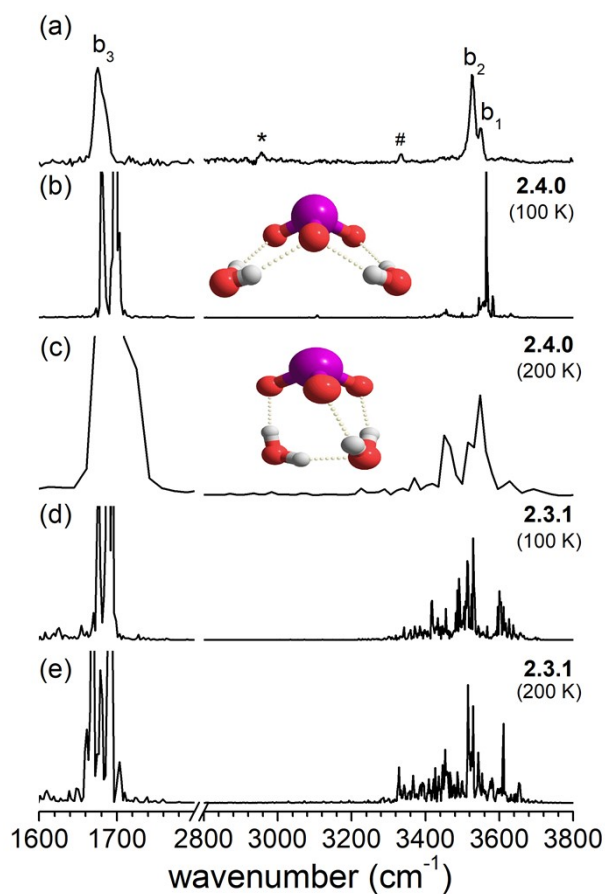

**Figure S3.** Comparison of IRPD spectrum (trace a) of  $D_2$ -tagged  $[IO_3^-(H_2O)_2]$  with the AIMD derived spectra from the two lowest energy isomer **2.4.0** (trace b and c) and **2.3.1** (trace d and e) at 100 K and 200 K. The band due to  $D_2$  stretching oscillator and the feature arises from overtone of scissoring bend mode of  $H_2O$  are denoted by asterisk (\*) and hash (#), respectively.

**Figure S4.** Comparison of IRPD spectrum (trace a) of D<sub>2</sub>-tagged IO<sub>3</sub><sup>-</sup>(H<sub>2</sub>O)<sub>3</sub> with scaled MP2/def2TZVP (trace b) and unscaled VPT2/MP2/def2TZVP derived anharmonic (trace c) IR spectra of the lowest energy isomer **3.3.3**, respectively. The effect of messenger (D<sub>2</sub>) tagging and MD simulated spectra obtained at 100 K from starting structure **3.3.3** have been shown in

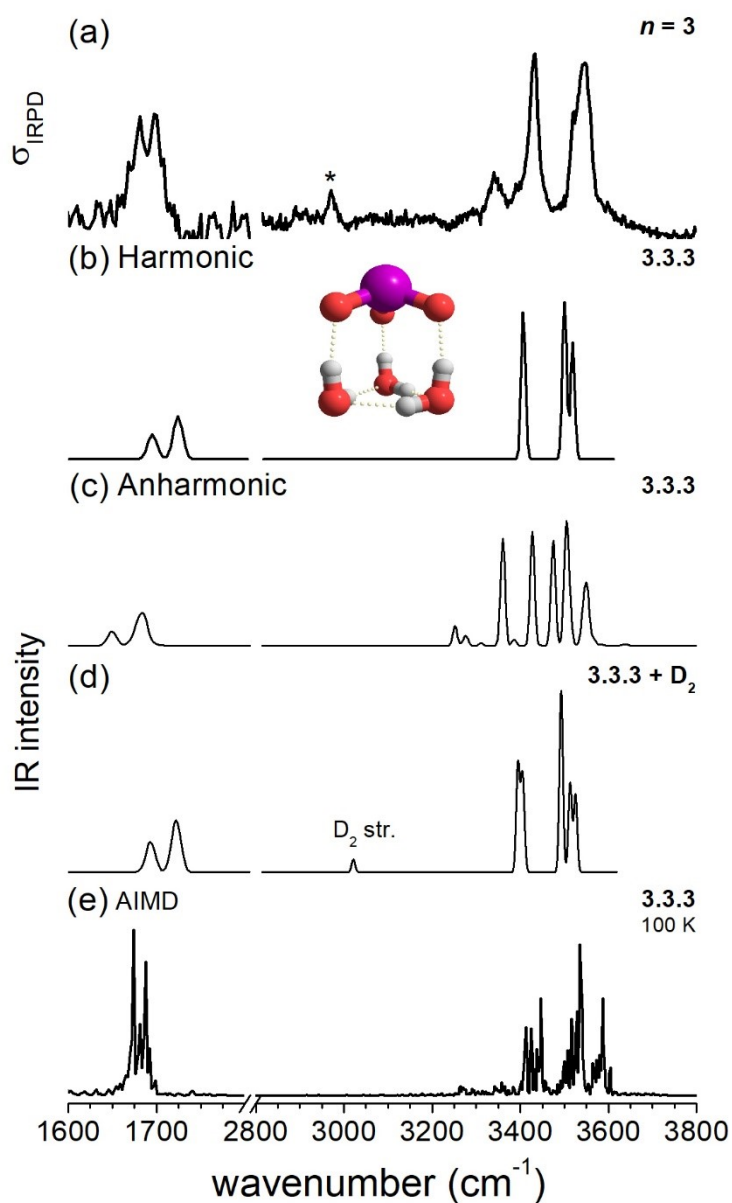

trace d and e, respectively.

**Figure S5.** (a) Structure of the most stable isomer **3.3.3** of  $[\text{IO}_3^-(\text{H}_2\text{O})_3]$ , (b) a snapshot from AIMD simulation at 20 K exhibiting the deformation of the structure, notably, with elongation of a hydrogen bond to 302 pm from 192 pm.

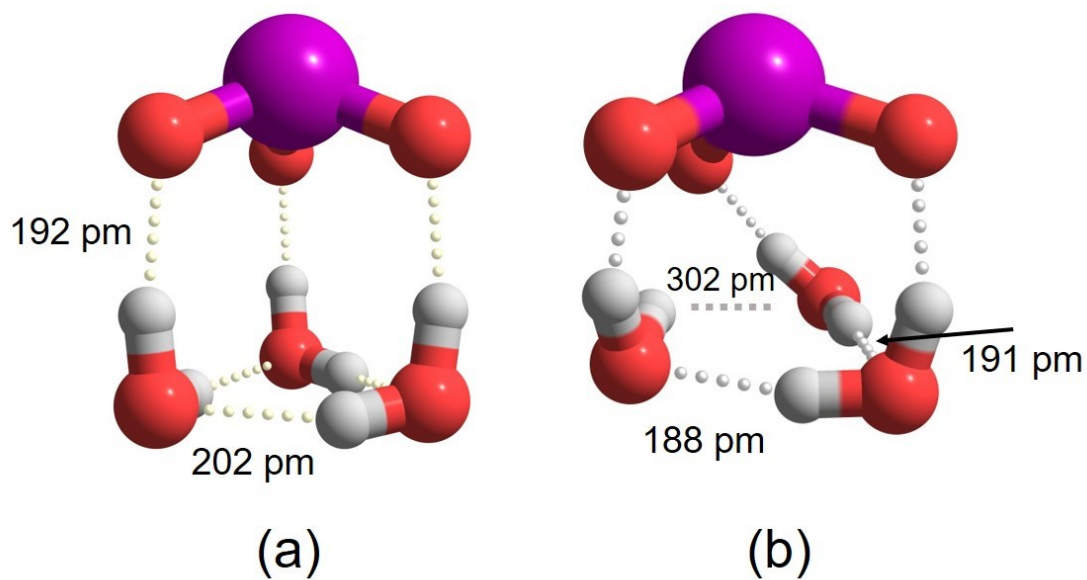

**Figure S6.** Comparison of IRPD spectrum (trace a) of D<sub>2</sub>-tagged IO<sub>3</sub><sup>-</sup>(H<sub>2</sub>O)<sub>6</sub> with scaled MP2/def2TZVP derived harmonic IR spectra of the lowest energy isomers **6.5.6a** (trace b), **6.5.6b** (trace c), **6.6.6a** (trace d) and **6.6.6b** (trace e). The band due to D<sub>2</sub> stretching oscillation is marked with \* in trace a.

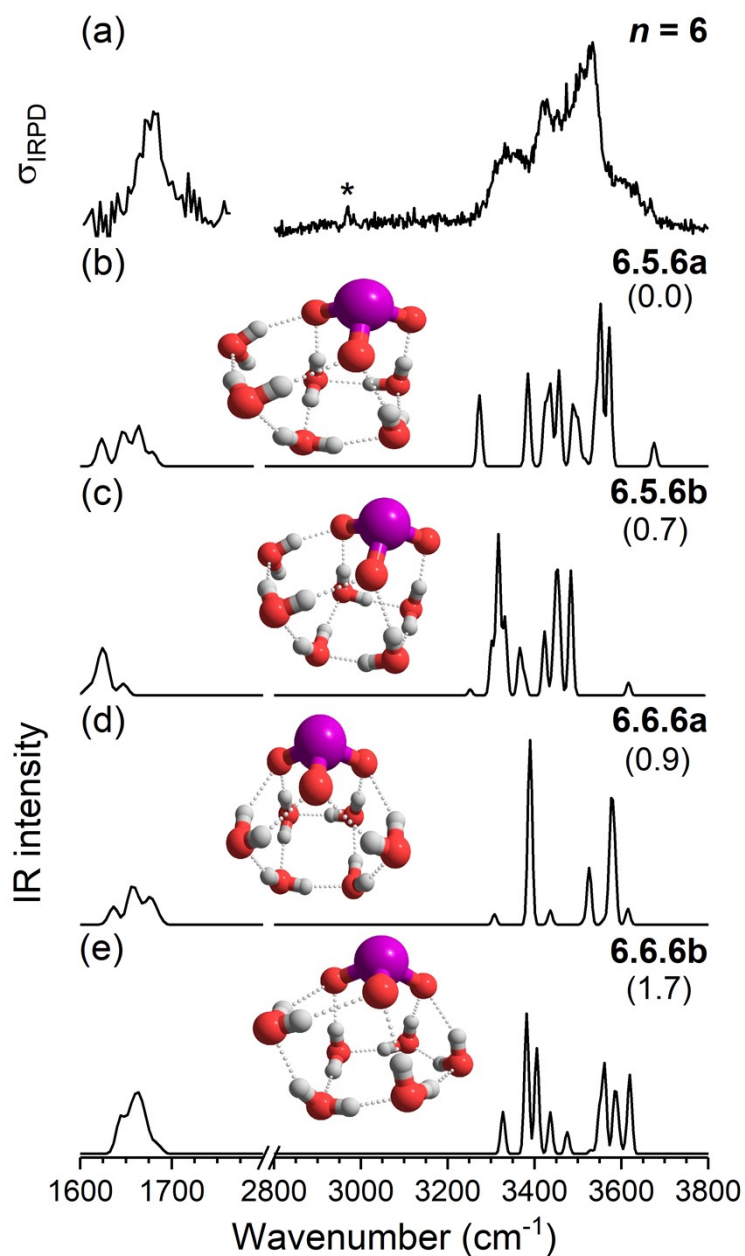

**Figure S7.** Comparison of IRPD spectrum of D<sub>2</sub>-tagged IO<sub>3</sub><sup>-</sup>(H<sub>2</sub>O)<sub>7</sub> (trace a) with scaled MP2/def2TZVP derived harmonic IR spectra of the lowest energy isomer **7.5.9a** (trace b) and **7.5.9b** (trace c). The band due to D<sub>2</sub> stretching mode is marked with \* in trace a.

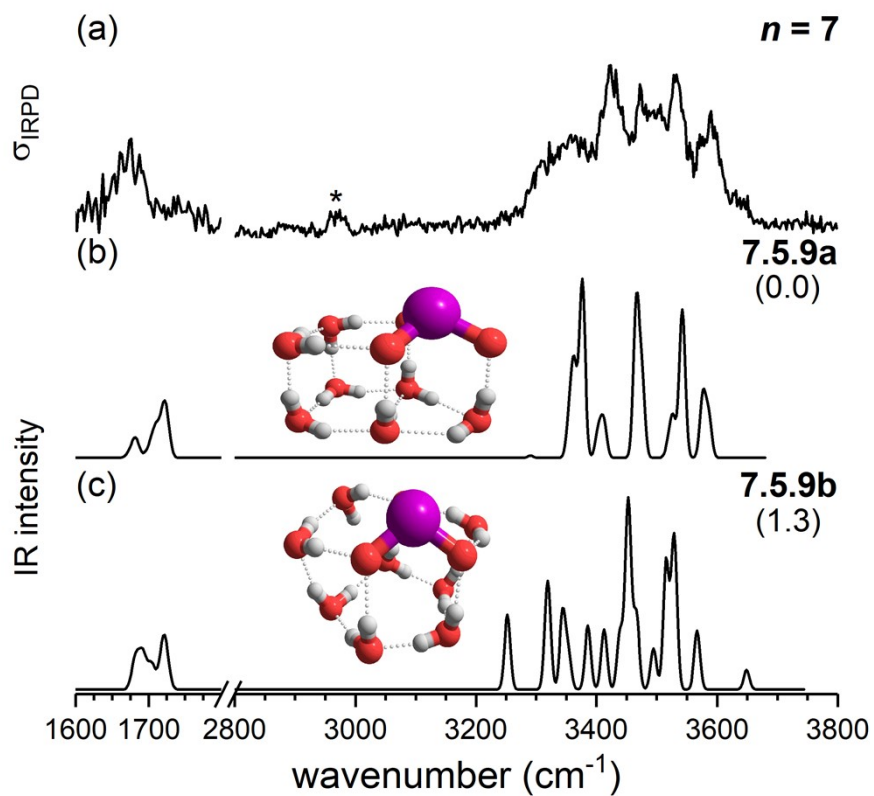

**Figure S8.** Comparison of IRPD spectrum of D<sub>2</sub>-tagged IO<sub>3</sub><sup>-</sup>(H<sub>2</sub>O)<sub>8</sub> (trace a) with scaled MP2/def2TZVP derived harmonic IR spectra of the lowest energy isomer **8.6.10** (trace b) and **8.7.8** (trace c). The unscaled AIMD spectra derived at 100 K and 150 K from **8.6.10** are plotted

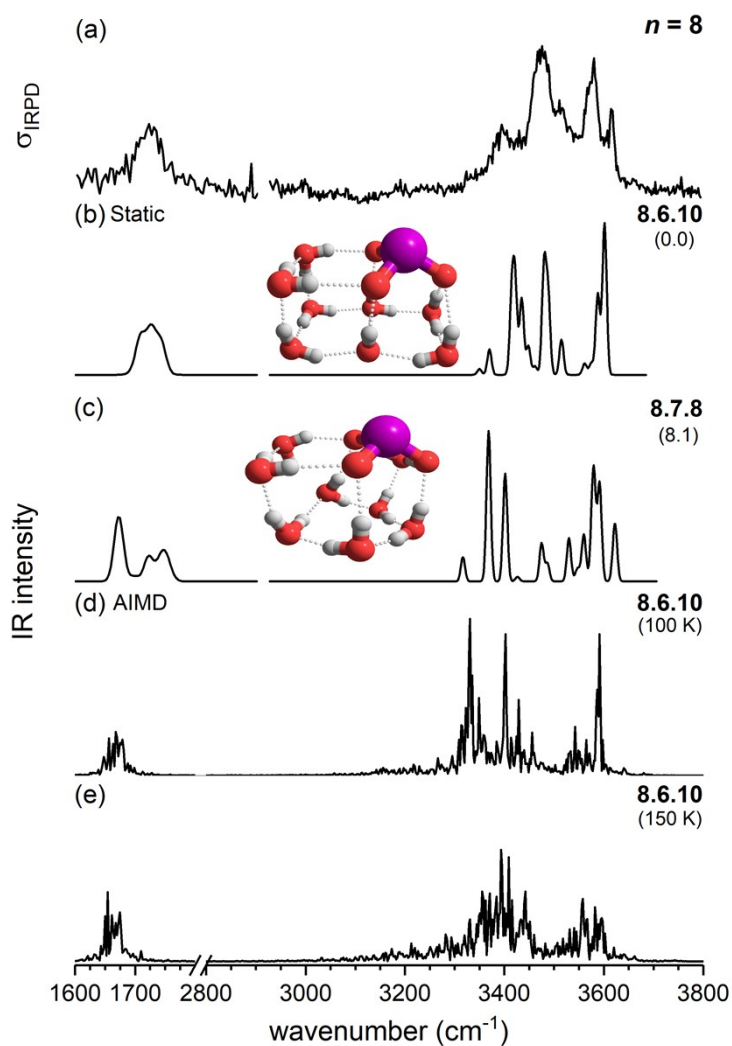

in trace d and e, respectively.

**Fig S9.** Mass spectrum of iodate-water clusters,  $\text{IO}_3^-(\text{H}_2\text{O})_n$ , in the  $m/z$  range up to 900 amu, obtained by spraying 10 mM solution of  $\text{KIO}_3$  in 1:1 water/acetonitrile mixture. The progression with an origin 175 amu and a spacing of 18 amu is assigned to  $n = 0$  to 40 clusters size.

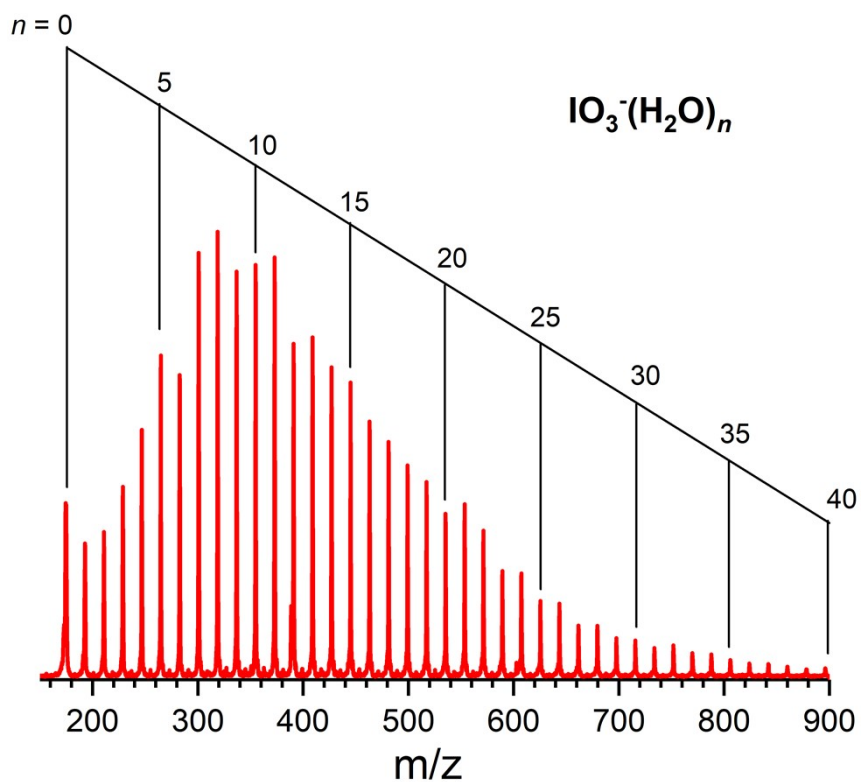

**Figure S10.** Comparison of IRPD spectrum (trace a) with IRMPD (trace b) one for the iodate-water complex  $[\text{IO}_3^-(\text{H}_2\text{O})_n]$  at  $n = 11$  in OH stretching region. IRPD and IRMPD traces are recorded monitoring the  $\text{D}_2$  and  $\text{H}_2\text{O}$  dissociation channels, respectively. Bands  $i_3$  and  $i_4$  are IRMPD transparent.

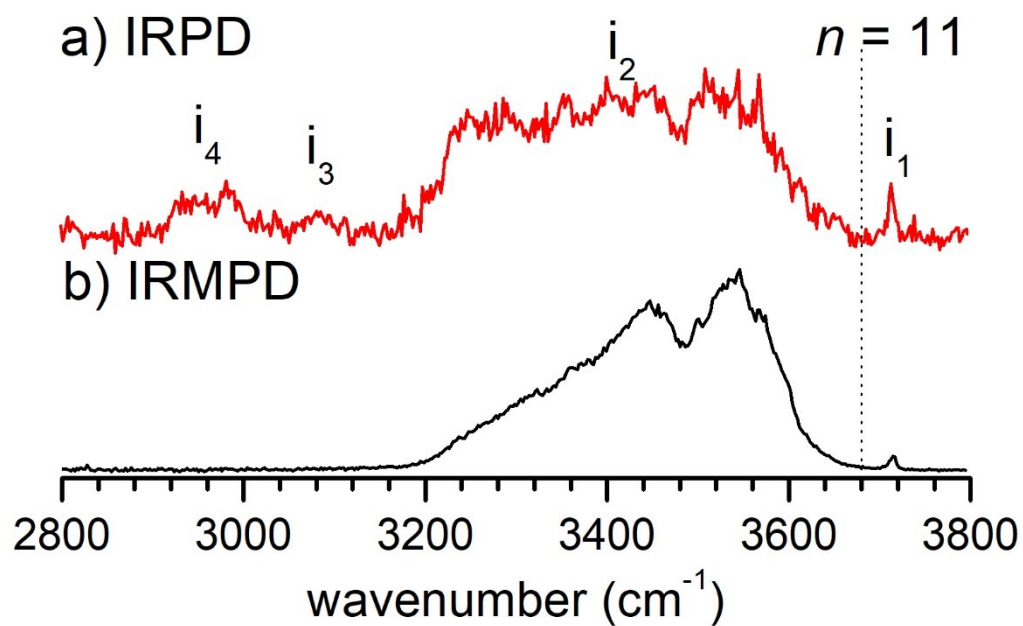

Supplement: d6cp01186a1.pdf [file d6cp01186a1.pdf]
